# Supplementary material
Source: Springer Nature journal article supplement (https://www.springerprofessional.de/resource/supplementary/13638_2014_1062_MOESM1_ESM.pdf/11898932)

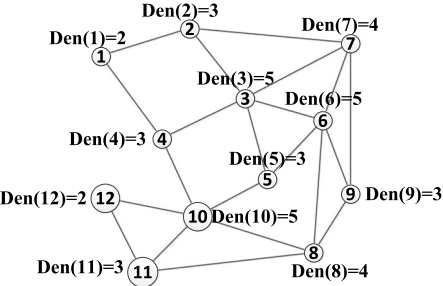

(a)

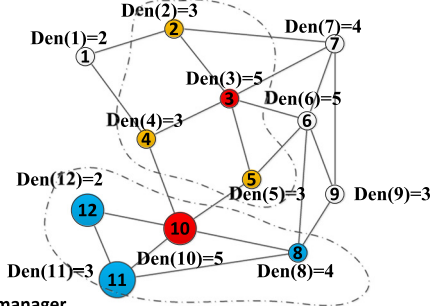

(b)

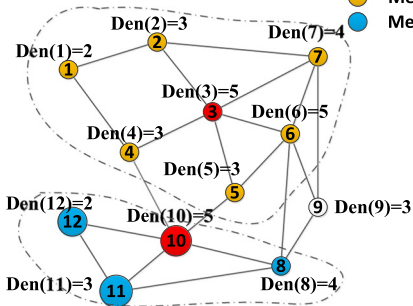

(c)

- Group manager
- Member of Group 3
- Member of Group 10

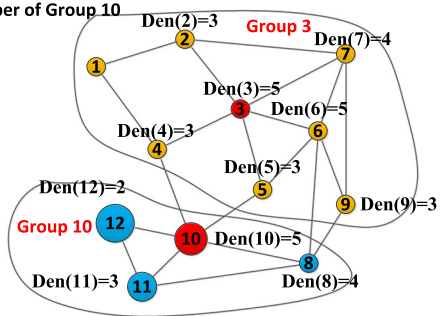

(d)

Supplement: MOESM1 [file 11898932]
